# Supplementary figures and images for: Digital quantification and selection of high-lipid-producing microalgae through a lateral dielectrophoresis-based microfluidic platform
Source: Royal Society of Chemistry journal article supplement (doi:10.1039/c9lc00850k), 2019-01-01

# Lateral cell movement by DEP force

(a) **DEP OFF**

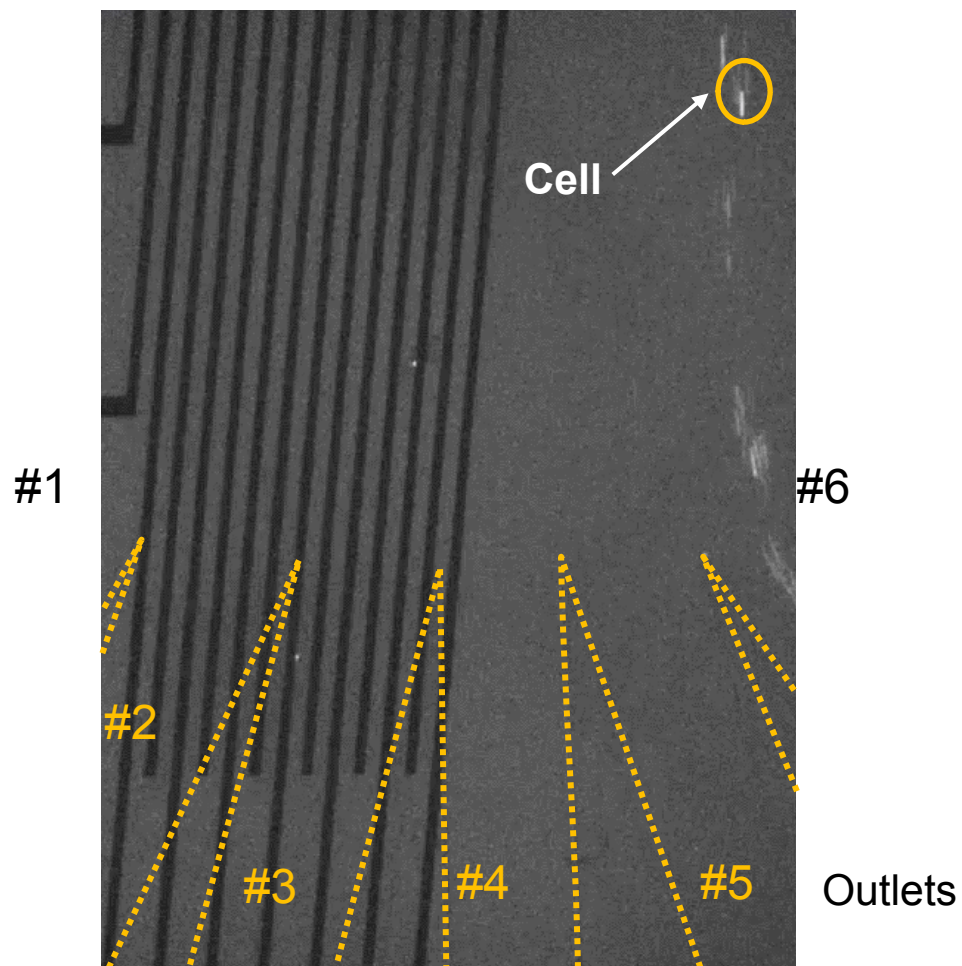

(b) **DEP ON**

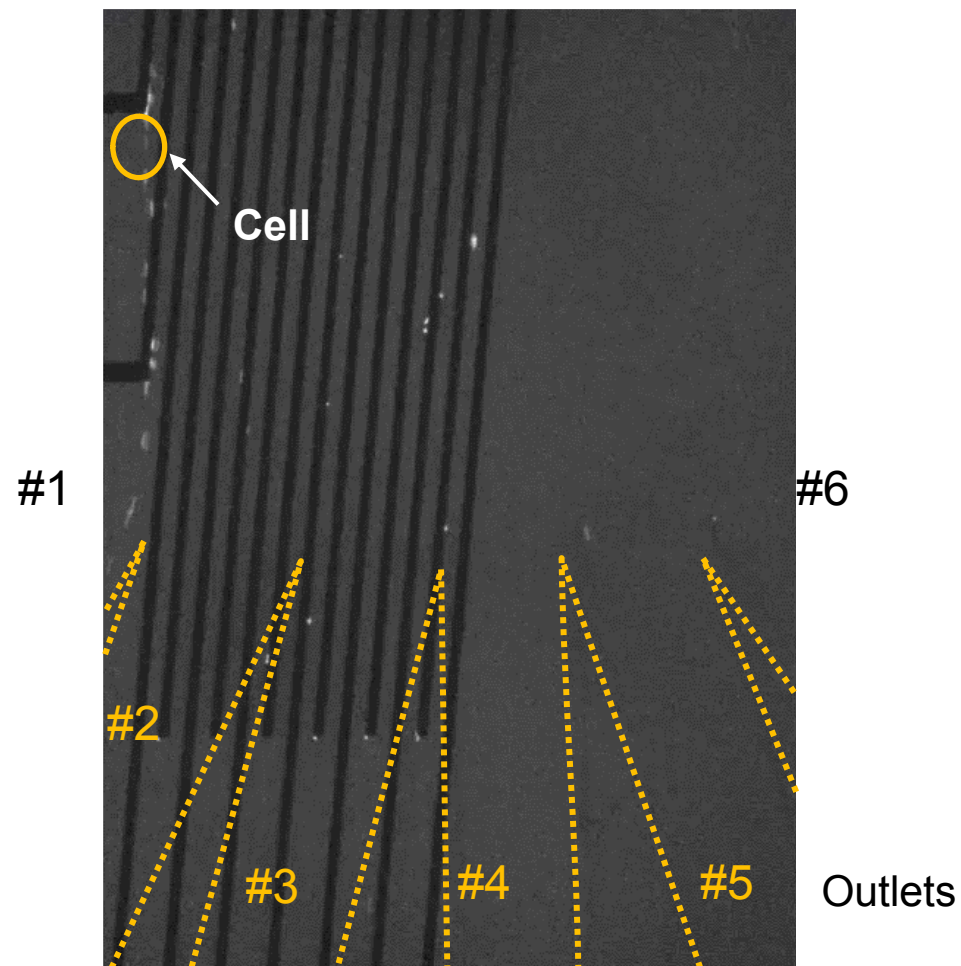

Supplement: c9lc00850k2.pdf [file c9lc00850k2.pdf]
